# Supplementary material for: Differences in cardiovascular disease mortality between northern and southern China under exposure to different temperatures: a systematic review
Source: PeerJ journal article supplement (doi:10.7717/peerj.18355), 2024-10-30
Supplement: TableS1.pdf [file TableS1.pdf]

Table S1 Summary of the assessment of the quality of the evidence on extreme cold, extreme heat and extremely high DTR as a risk factor for CVD.

| Reference                          | Extreme cold(n=13) |                                                                                                                            | Extreme heat(n=12) |                                                                                                                            | Extremely high DTR(n=8) |                                                                                                                            |
|------------------------------------|--------------------|----------------------------------------------------------------------------------------------------------------------------|--------------------|----------------------------------------------------------------------------------------------------------------------------|-------------------------|----------------------------------------------------------------------------------------------------------------------------|
|                                    | rating             | bias                                                                                                                       | rating             | bias                                                                                                                       | rating                  | bias                                                                                                                       |
| Quality of the evidence assessment |                    |                                                                                                                            |                    |                                                                                                                            |                         |                                                                                                                            |
| <b>i=Downgrade considerations</b>  |                    |                                                                                                                            |                    |                                                                                                                            |                         |                                                                                                                            |
| Risk of bias across studies        | 0                  | There is no substantial risk of bias across most studies.                                                                  | 0                  | There is no substantial risk of bias across most studies.                                                                  | 0                       | There is no substantial risk of bias across most studies.                                                                  |
| Indirectness                       | 0                  | CVD mortality was appropriate outcome, studies conducted in the population of interest, mostly direct measures of exposure | 0                  | CVD mortality was appropriate outcome, studies conducted in the population of interest, mostly direct measures of exposure | 0                       | CVD mortality was appropriate outcome, studies conducted in the population of interest, mostly direct measures of exposure |
| Inconsistency                      | 0                  | Effect estimates likely to differ because of differences in study methods and not be driven by unexpected heterogeneity    | 0                  | Effect estimates likely to differ because of differences in study methods and not be driven by unexpected heterogeneity    | 0                       | Effect estimates likely to differ because of differences in study methods and not be driven by unexpected heterogeneity    |
| Imprecision                        | -1                 | Three studies had wide confidence intervals.                                                                               | -1                 | One study had wide confidence intervals.                                                                                   | -1                      | One study had wide confidence intervals.                                                                                   |
| Publication bias                   | -1                 | The evidence of publication bias was inspected visually in the egger's test.                                               | -1                 | The evidence of publication bias was inspected visually in the egger's test.                                               | 0                       | No evidence for publication bias for studies that would meet our inclusion criteria.                                       |
| <b>ii. Upgrade considerations</b>  |                    |                                                                                                                            |                    |                                                                                                                            |                         |                                                                                                                            |
| Size of the effect                 | 1                  | Effect sizes are big in most studies                                                                                       | 1                  | Effect sizes are big in most studies                                                                                       | 1                       | Effect sizes are small in most studies                                                                                     |
| Dose response pattern              | 1                  | Most studies report broadly similar dose-response pattern                                                                  | 1                  | Most studies report broadly similar dose-response pattern                                                                  | 1                       | Most studies report broadly similar dose-response pattern                                                                  |
| Confounding minimizes              | 0                  | There is no evidence to suggest that possible residual confounding factors reduce the estimation                           | 0                  | There is no evidence to suggest that possible residual confounding factors reduce the estimation                           | 0                       | There is no evidence to suggest that possible residual confounding factors reduce the estimation                           |

| effect                                        |          | of effectiveness                                                                                                                                                                                                      |          | of effectiveness                                                                                                                                                                                                      |      | of effectiveness                                                                                                                                                                                                      |
|-----------------------------------------------|----------|-----------------------------------------------------------------------------------------------------------------------------------------------------------------------------------------------------------------------|----------|-----------------------------------------------------------------------------------------------------------------------------------------------------------------------------------------------------------------------|------|-----------------------------------------------------------------------------------------------------------------------------------------------------------------------------------------------------------------------|
| <b>iii. Summary of the quality assessment</b> |          |                                                                                                                                                                                                                       |          |                                                                                                                                                                                                                       |      |                                                                                                                                                                                                                       |
| Overall quality of evidence starts:           | Moderate | Moderate + (-1) + (-1) + 1 + 1 = moderate, Downgrading/upgrading resulted in moderate rating for the quality of evidence                                                                                              | Moderate | Moderate + (-1) + (-1) + 1 + 1 = moderate, Downgrading/upgrading resulted in moderate rating for the quality of evidence                                                                                              | High | Moderate + (-1) + 1 + 1 = high, Downgrading/upgrading resulted in high rating for the quality of evidence                                                                                                             |
| Summary of findings                           | n/a      | Overall, the evidence for a higher risk of cardiovascular mortality with extreme cold exposure was of moderate quality                                                                                                | n/a      | Overall, the evidence for a higher risk of cardiovascular mortality with extreme heat exposure was of moderate quality                                                                                                | n/a  | Overall, the evidence for a higher risk of cardiovascular mortality with extremely high DTR exposure was of moderate quality                                                                                          |
| Strength of evidence assessment               |          |                                                                                                                                                                                                                       |          |                                                                                                                                                                                                                       |      |                                                                                                                                                                                                                       |
| Quality of evidence                           | Moderate |                                                                                                                                                                                                                       | Moderate |                                                                                                                                                                                                                       | High |                                                                                                                                                                                                                       |
| Direction of effect estimates                 | n/a      | Direction largely as expected                                                                                                                                                                                         | n/a      | Direction largely as expected                                                                                                                                                                                         | n/a  | Direction largely as expected                                                                                                                                                                                         |
| Confidence in effect estimate                 | n/a      | Studies on extreme cold measure directly the outcome of interest, direction of effect is largely consistent, majority score low on risk of bias.                                                                      | n/a      | Studies on extreme heat measure directly the outcome of interest, direction of effect is largely consistent, majority score low on risk of bias.                                                                      | n/a  | Studies on extremely high DTR measure directly the outcome of interest, direction of effect is largely consistent, majority score low on risk of bias.                                                                |
| Other aspects                                 | n/a      | Differences in contextual factors, including population exposure level and vulnerability, differences in physical and physiological adaptation across study populations make interpretation and comparison difficult. | n/a      | Differences in contextual factors, including population exposure level and vulnerability, differences in physical and physiological adaptation across study populations make interpretation and comparison difficult. | n/a  | Differences in contextual factors, including population exposure level and vulnerability, differences in physical and physiological adaptation across study populations make interpretation and comparison difficult. |

|                              |            |                                                                                                                                                                                                                                                                                                                                                                                                           |            |                                                                                                                                                                                                                                                                                                                                                                                                             |            |                                                                                                                                                                                                                                                                                                                                                                                                                 |
|------------------------------|------------|-----------------------------------------------------------------------------------------------------------------------------------------------------------------------------------------------------------------------------------------------------------------------------------------------------------------------------------------------------------------------------------------------------------|------------|-------------------------------------------------------------------------------------------------------------------------------------------------------------------------------------------------------------------------------------------------------------------------------------------------------------------------------------------------------------------------------------------------------------|------------|-----------------------------------------------------------------------------------------------------------------------------------------------------------------------------------------------------------------------------------------------------------------------------------------------------------------------------------------------------------------------------------------------------------------|
| Overall strength of evidence | sufficient | We found sufficient evidence that extreme cold is positively associated with cardiovascular disease mortality in China, in which case chance, bias, and confounding factors can be reasonably excluded. The available evidence includes the results of one or more well designed studies, and quantitative estimates can only be interpreted broadly because of the lack of comparability across studies. | sufficient | We found sufficient evidence that extremely heat is positively associated with cardiovascular disease mortality in China, in which case chance, bias, and confounding factors can be reasonably excluded. The available evidence includes the results of one or more well designed studies, and quantitative estimates can only be interpreted broadly because of the lack of comparability across studies. | sufficient | We found sufficient evidence that extremely high DTR is positively associated with cardiovascular disease mortality in China, in which case chance, bias, and confounding factors can be reasonably excluded. The available evidence includes the results of one or more well designed studies, and quantitative estimates can only be interpreted broadly because of the lack of comparability across studies. |
|------------------------------|------------|-----------------------------------------------------------------------------------------------------------------------------------------------------------------------------------------------------------------------------------------------------------------------------------------------------------------------------------------------------------------------------------------------------------|------------|-------------------------------------------------------------------------------------------------------------------------------------------------------------------------------------------------------------------------------------------------------------------------------------------------------------------------------------------------------------------------------------------------------------|------------|-----------------------------------------------------------------------------------------------------------------------------------------------------------------------------------------------------------------------------------------------------------------------------------------------------------------------------------------------------------------------------------------------------------------|
